# Supplementary material for: Identification of QTL under Brassinosteroid-Combined Cold Treatment at Seedling Stage in Rice Using Genotyping-by-Sequencing (GBS)
Source: MDPI journal article supplement (doi:10.3390/plants11172324), 2022-09-05
Supplement: s1 [file s1]

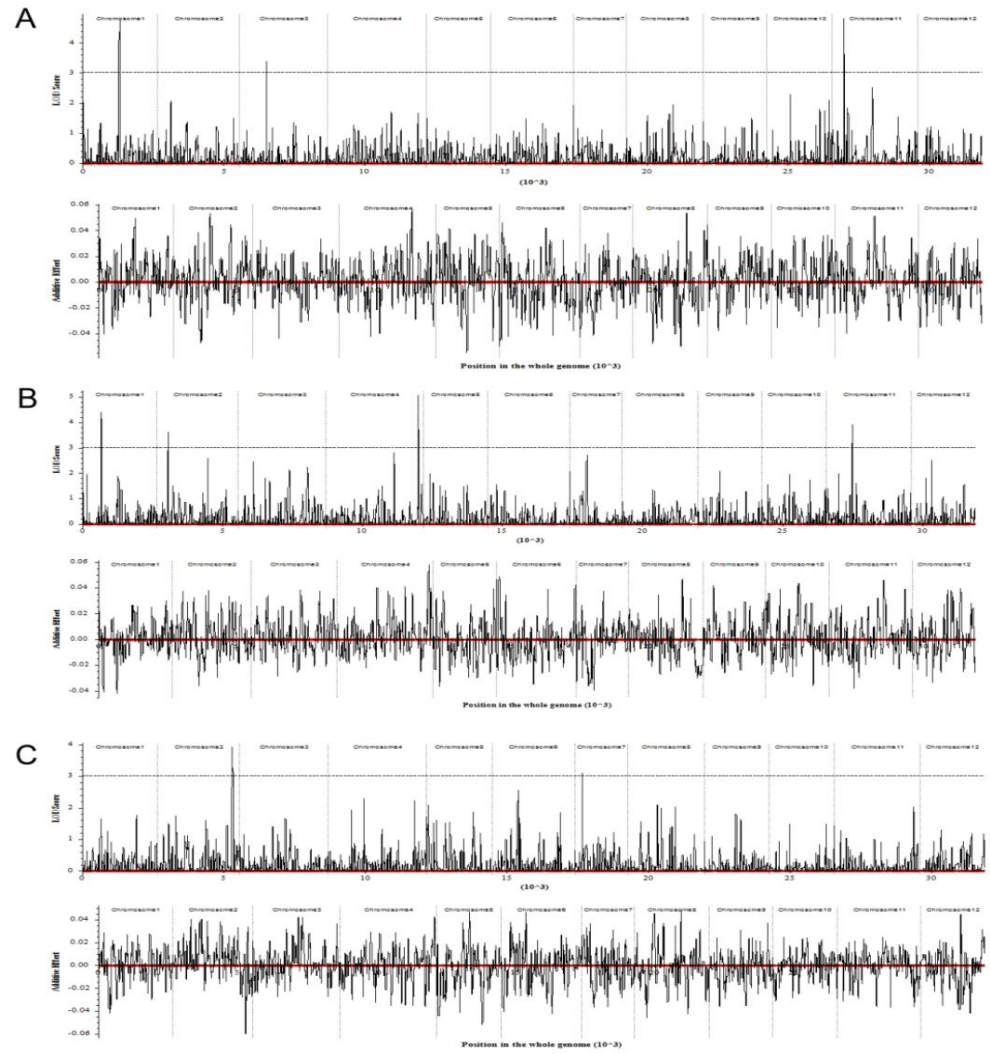

**Figure S1.** QTL mapping based on seedling shoot length (SSL). (A) Cold treatment; (B) Normal temperature condition were used as the control; (C) Cold treatment condition were used as the control.

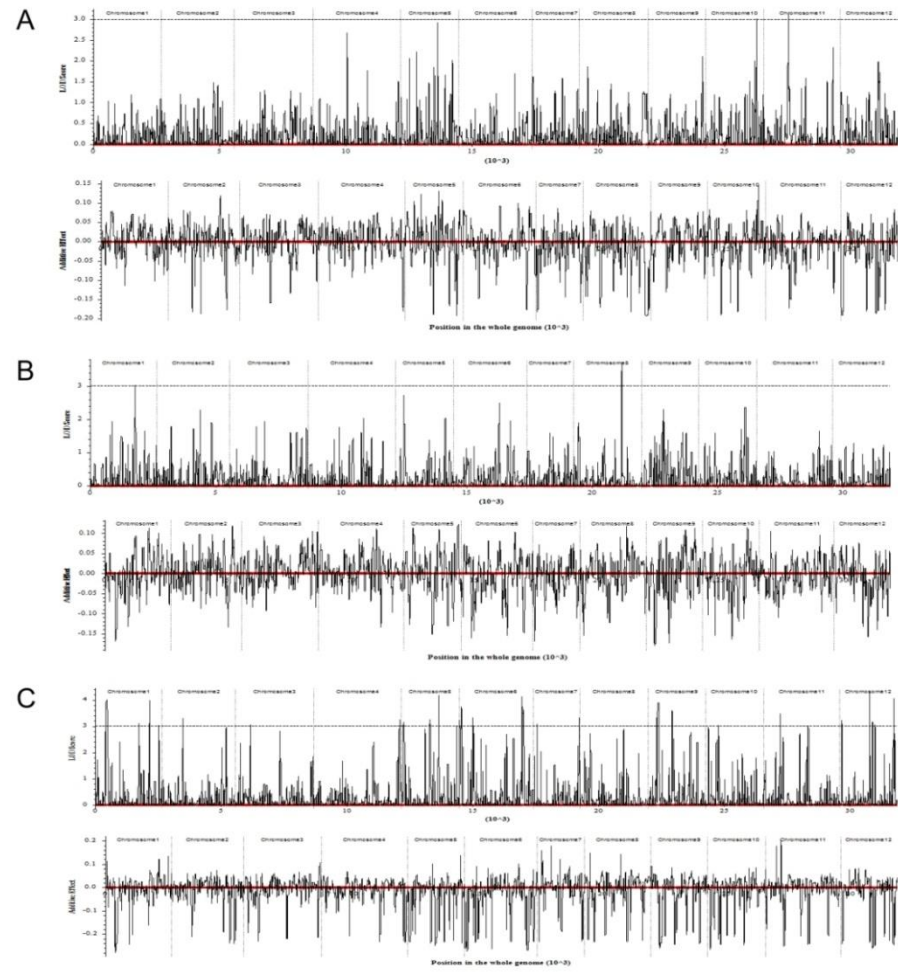

**Figure S2.** QTL mapping based on seedling root length (SRL). (A) Cold treatment; (B) Normal temperature condition were used as the control; (C) Cold treatment condition were used as the control.

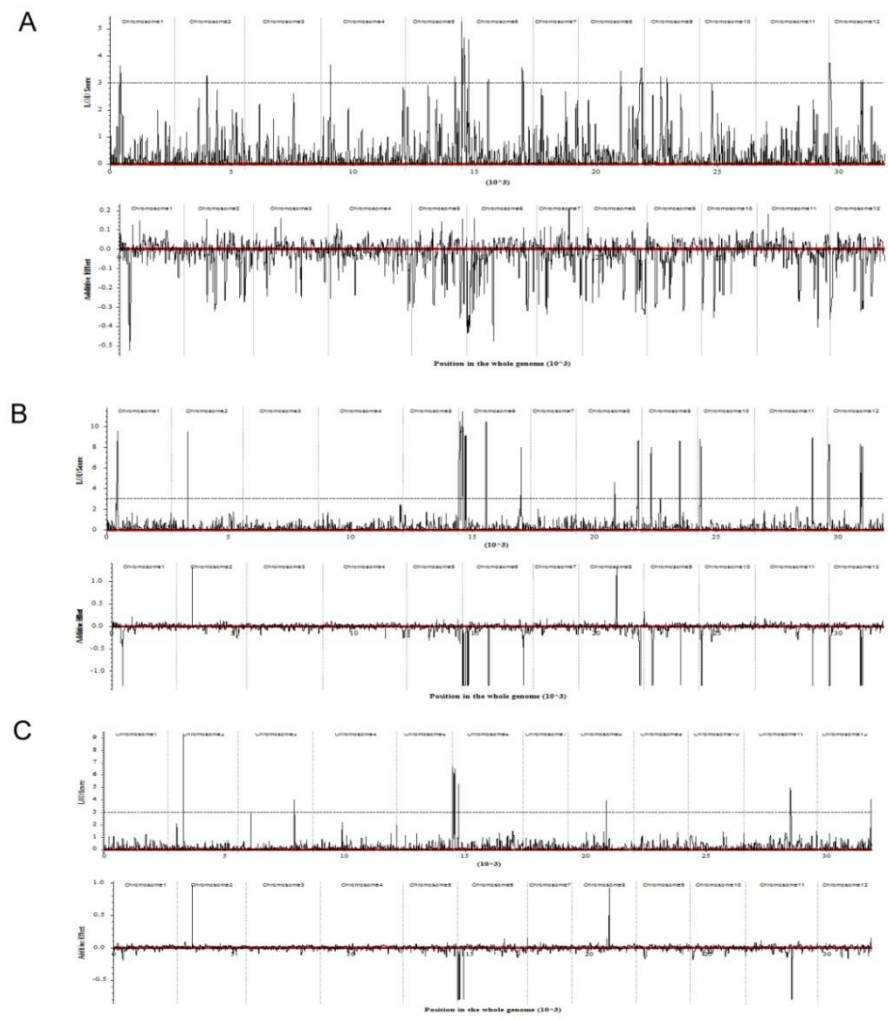

**Figure S3.** QTL mapping based on seedling dry weight (SDW). (A) Cold treatment; (B) Normal temperature condition were used as the control; (C) Cold treatment condition were used as the control.

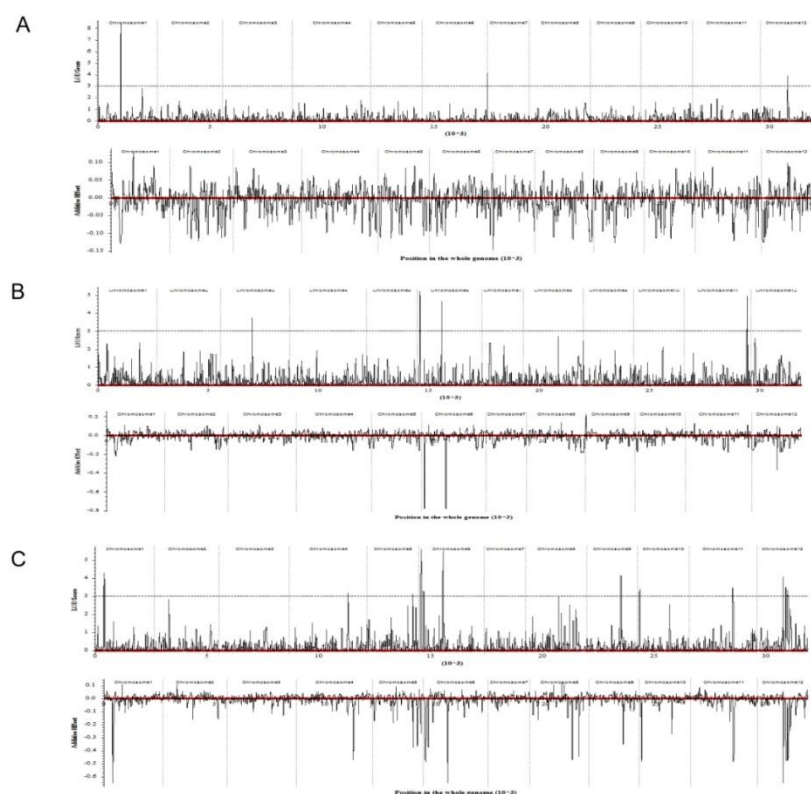

**Figure S4.** QTL mapping based on seedling wet weight (SWW). (A) Cold treatment; (B) Normal temperature condition were used as the control; (C) Cold treatment condition were used as the control.

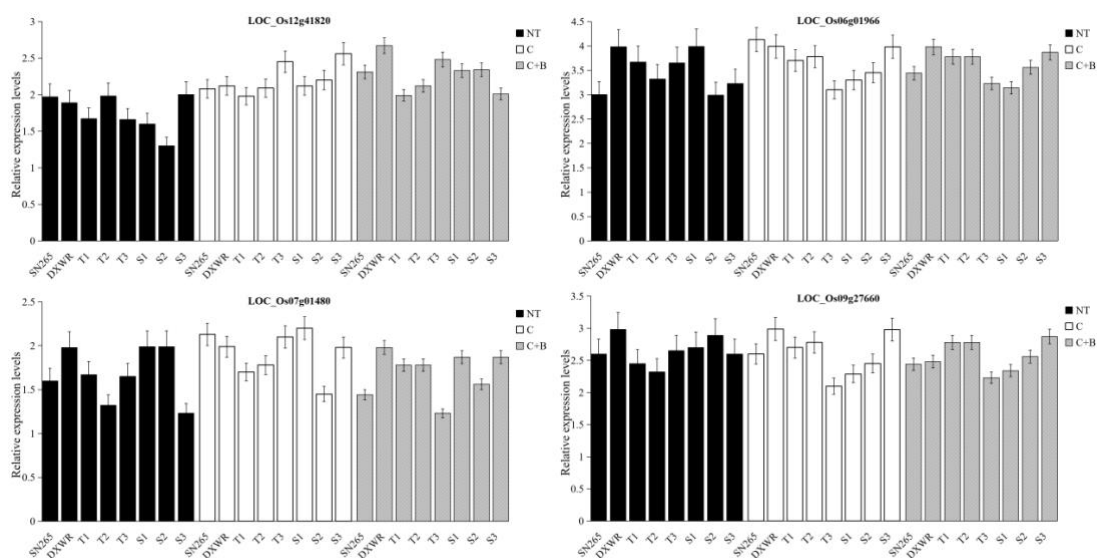

**Figure S5.** Expression patterns of some candidate genes (LOC\_Os12g41820, LOC\_Os06g01966, LOC\_Os07g01480, and LOC\_Os09g27660). NT, normal temperature; C, Cold stress; C+B, BR combined cold treatment.

**Table S1.** Details of primers used for this study.

| Gene ID or Name | Forward primer (5'-3')   | Reverse primer (5'-3')   |
|-----------------|--------------------------|--------------------------|
| LOC_Os01g40260  | CACTCAAAGCAGCACAAC<br>CC | CGATCTTGCTGCCGTTCTT<br>G |

|                                |                                         |
|--------------------------------|-----------------------------------------|
| LOC_Os11g45740                 | GCACAACATTTGCCTGGGA GGCGAGGCATCCTAGGTA  |
|                                | G C                                     |
| LOC_Os05g39380                 | AAATTCCACCATTGCGCC GGCCCCTCAAACCTACTC   |
|                                | C AC                                    |
| LOC_Os07g05805                 | GAGAACAAACAGAGGCGGG GGCTTACATCCCTTGCGGT |
|                                | A A                                     |
| LOC_Os12g41820                 | CCAGGCGTATACAGTGCA CCGCACAAACAAAGCTCG   |
|                                | CA A                                    |
| LOC_Os06g44750                 | GCCGGAAACAAGGACCTG TTGAGGATGCTGTGCGACGT |
|                                | TA C                                    |
| LOC_Os06g01966                 | TTGCTGCACTCCTAAGGGT AACTTGGTGTGTCAAGGC  |
|                                | G CA                                    |
| LOC_Os07g08440                 | GGACTTGGTCCCCAACACACCCAGCCTGCTCATACTCA  |
|                                | A G                                     |
| LOC_Os07g01480                 | CGCCTCAAGTCCACCTTCA GGATGATCTTGGTGTGCGG |
|                                | T A                                     |
| LOC_Os09g27660                 | TCATGTGAAAGGCGCCATC GCTCACCTGACTCAAAAG  |
|                                | T C                                     |
| LOC_Os03g50885( <i>actin</i> ) | TCGAGCATGGTATCGTCAG GGATGGCGAGTACATAGC  |
|                                | C A                                     |

**Table S2.** Summary of all candidate genes.

| Condition | QTL      | Chr | Locus name            | Gene coordinates    | Gene product                                                                    |
|-----------|----------|-----|-----------------------|---------------------|---------------------------------------------------------------------------------|
| Cold      | qSSL1-2  | 1   | LOC_Os01g40260        | 22731943-22733237   | OsWRKY77 - Superfamily of TFs having WRKY and zinc finger domains               |
| BRs+Cold  | qSWW11-2 | 11  | LOC_Os11g45740        | 27670321-27673334   | MYB family transcription factor                                                 |
| BRs+Cold  | qSRL9-2  | 9   | LOC_Os09g04504        | 2396780-2400181     | Iron and phosphorus responsive genes                                            |
| BRs+Cold  | qSDW3-1  | 3   | LOC_Os03g50090        | 28568746-28571308   | Iron and phosphorus responsive genes                                            |
| BRs+Cold  | qSSL11-2 | 11  | LOC_Os11g04104        | 1657863-1668362     | Major facilitator superfamily antiporter                                        |
| old       | qSSL11-1 | 11  | LOC_Os11g11960        | 6640922 - 6638262   | disease resistance protein RPM1, putative, expressed                            |
| Cold      | qSSL11-1 | 11  | LOC_Os11g11990        | 6655976 - 6663781   | NB-ARC domain containing protein, expressed                                     |
| BRs+C-N   | qSSL1-1  | 1   | <u>LOC_Os01g21670</u> | 12161768 - 12157455 | plant protein of unknown function domain containing protein, expressed          |
| BRs+C-N   | qSSL1-1  | 1   | <u>LOC_Os01g21710</u> | 12184857 - 12186827 | plant protein of unknown function domain containing protein, expressed          |
| BRs+C-N   | qSSL1-1  | 1   | <u>LOC_Os01g21820</u> | 12248213 - 12235262 | preprotein translocase subunit secA, chloroplast precursor, putative, expressed |
| BRs+C-N   | qSSL1-1  | 1   | <u>LOC_Os01g21850</u> | 12263046 - 12258138 | protein transport protein-related, putative, expressed                          |
| BRs+C-N   | qSSL7-1  | 7   | LOC_Os07g05805        | 23483968..23485531  | OsBZR1, Transcription factor, Brassinosteroid (BR)-regulated growth response    |
| BRs+C-N   | qSSL1-1  | 1   | <u>LOC_Os01g21860</u> | 12264911 - 12269085 | AGAP010768-PA, putative, expressed                                              |
| BRs+C-C   | qSRL5-3  | 5   | <u>LOC_Os05g39380</u> | 23101671 - 23104153 | zinc finger, C3HC4 type domain containing protein, expressed                    |
| BRs+C-C   | qSRL5-3  | 5   | <u>LOC_Os05g39390</u> | 23109898 - 23104197 | outer membrane protein, OMP85 family protein, expressed                         |
| BRs+C-C   | qSRL12-6 | 12  | <u>LOC_Os12g41680</u> | 25800944 - 25806553 | No apical meristem protein, putative, expressed                                 |
| BRs+C-C   | qSRL12-6 | 12  | <u>LOC_Os12g41690</u> | 25812631 - 25807626 | membrane associated DUF588 domain containing protein, putative, expressed       |
| BRs+C-C   | qSRL12-6 | 12  | <u>LOC_Os12g41700</u> | 25818874 - 25815277 | LSD1 zinc finger domain containing protein, expressed                           |
| BRs+C-C   | qSRL12-6 | 12  | <u>LOC_Os12g41710</u> | 25824699 - 25820749 | Protein kinase domain containing protein, expressed                             |
| BRs+C-C   | qSRL12-6 | 12  | <u>LOC_Os12g41715</u> | 25832900 - 25828364 | DEAD-box ATP-dependent RNA helicase, putative, expressed                        |

|                     |             |    |                                |                     |                                                                                       |
|---------------------|-------------|----|--------------------------------|---------------------|---------------------------------------------------------------------------------------|
| BRs+C-C             | qSRL12-6    | 12 | <a href="#">LOC_Os12g41720</a> | 25840479 - 25838564 | PLA IIIA/PLP7, putative, expressed                                                    |
| BRs+C-C             | qSRL12-6    | 12 | <a href="#">LOC_Os12g41780</a> | 25882977 - 25885922 | glycosyl transferase family 17 protein, putative, expressed                           |
| BRs+C-C             | qSRL12-6    | 12 | <a href="#">LOC_Os12g41790</a> | 25886211 - 25887243 | DEFL3 - Defensin and Defensin-like DEFL family, expressed                             |
| BRs+C-C             | qSRL12-6    | 12 | <a href="#">LOC_Os12g41800</a> | 25892992 - 25888923 | VTC2, putative, expressed                                                             |
| BRs+C-C             | qSRL12-6    | 12 | <a href="#">LOC_Os12g41820</a> | 25907573 - 25901456 | heat shock protein DnaJ, putative, expressed                                          |
| BRs+C-C             | qSRL12-6    | 12 | <a href="#">LOC_Os12g41830</a> | 25914643 - 25911188 | Methyltransferase small domain containing protein, expressed                          |
| BRs+C-C             | qSRL12-6    | 12 | <a href="#">LOC_Os12g41840</a> | 25917832 - 25916322 | protein transport protein Sec61 subunit alpha, putative, expressed                    |
| BRs+C-C             | qSRL12-6    | 12 | <a href="#">LOC_Os12g41860</a> | 25927353 - 25920639 | START domain containing protein, expressed                                            |
| Cold/BRs+C-N        | qSDW1-3/4   | 1  | <a href="#">LOC_Os01g17070</a> | 9816783 - 9822750   | Putative Deg protease homologue                                                       |
| Cold/BRs+C-N        | qSDW6-18/17 | 6  | <a href="#">LOC_Os06g44750</a> | 27025437 - 27029339 | AP2 domain containing protein, expressed                                              |
| Cold/BRs+C-N        | qSDW9-2/3   | 9  | <a href="#">LOC_Os09g10850</a> | 5940418 - 5935331   | meiotic coiled-coil protein 7, putative, expressed                                    |
| Cold/BRs+C-N        | qSDW9-2/3   | 9  | <a href="#">LOC_Os09g10840</a> | 5918077 - 5929775   | transcription factor, putative, expressed                                             |
| Cold/BRs+C-N        | qSDW12-5/6  | 12 | <a href="#">LOC_Os12g33962</a> | 20514770 - 20515834 | uncharacterized tatC-like protein ymf16, putative, expressed                          |
| Cold/BRs+C-N        | qSDW12-5/6  | 12 | <a href="#">LOC_Os12g33958</a> | 20503266 - 20509254 | NADH-ubiquinone oxidoreductase 49 kDa subunit, putative, expressed                    |
| BRs+C-N/<br>BRs+C-C | qSDW6-9/10  | 6  | <a href="#">LOC_Os06g01966</a> | 543057 - 545780     | auxin-induced protein 5NG4, putative, expressed                                       |
| BRs+C-N             | qSDW9-1     | 9  | <a href="#">LOC_Os09g04624</a> | 2458920 - 2474678   | GDSL-like lipase/acylhydrolase, putative, expressed                                   |
| BRs+C-N             | qSDW9-1     | 9  | <a href="#">LOC_Os09g04670</a> | 2493538 - 2489758   | DAG protein, chloroplast precursor, putative, expressed                               |
| BRs+C-N             | qSDW9-1     | 9  | <a href="#">LOC_Os09g04710</a> | 2501667 - 2504421   | GDSL-like lipase/acylhydrolase, putative, expressed                                   |
| BRs+C-N             | qSDW9-1     | 9  | <a href="#">LOC_Os09g04720</a> | 2508294 - 2505261   | SWIB/MDM2 domain containing protein, expressed                                        |
| BRs+C-N             | qSDW9-1     | 9  | <a href="#">LOC_Os09g04730</a> | 2517277 - 2512441   | dehydrogenase/reductase SDR family member 2, putative, expressed                      |
| BRs+C-N             | qSDW9-5     | 9  | <a href="#">LOC_Os09g27620</a> | 16786041 - 16788255 | PHD-finger domain containing protein, putative, expressed                             |
| BRs+C-N             | qSDW9-5     | 9  | <a href="#">LOC_Os09g27650</a> | 16822234 - 16825686 | ZOS9-14 - C2H2 zinc finger protein, expressed                                         |
| BRs+C-N             | qSDW9-5     | 9  | <a href="#">LOC_Os09g27660</a> | 16829409 - 16837307 | OsFBO21 - F-box and other domain containing protein, expressed                        |
| BRs+C-N             | qSDW10-1    | 10 | <a href="#">LOC_Os10g04590</a> | 2185226 - 2188547   | OsFBX358 - F-box domain containing protein, expressed                                 |
| BRs+C-N             | qSDW10-1    | 10 | <a href="#">LOC_Os10g04600</a> | 2191954 - 2194603   | OsFBX359 - F-box domain containing protein, expressed                                 |
| BRs+C-N             | qSDW10-1    | 10 | <a href="#">LOC_Os10g04610</a> | 2196559 - 2198967   | OsFBX360 - F-box domain containing protein, expressed                                 |
| BRs+C-N             | qSDW10-1    | 10 | <a href="#">LOC_Os10g04620</a> | 2201493 - 2206735   | OsPOP20 - Putative Prolyl Oligopeptidase homologue, expressed                         |
| BRs+C-N             | qSDW10-1    | 10 | <a href="#">LOC_Os10g04674</a> | 2237611 - 2226986   | disease resistance protein RPM1, putative, expressed                                  |
| BRs+C-N             | qSDW10-1    | 10 | <a href="#">LOC_Os10g04700</a> | 2245973 - 2243002   | OsFBX361 - F-box domain containing protein, expressed                                 |
| BRs+C-N             | qSDW10-1    | 10 | <a href="#">LOC_Os10g04720</a> | 2252231 - 2249380   | TKL_IRAK_DUF26-la.5 - DUF26 kinases have homology to DUF26 containing loci, expressed |
| BRs+C-N             | qSDW10-1    | 10 | <a href="#">LOC_Os10g04730</a> | 2257490 - 2262626   | TKL_IRAK_DUF26-la.6 - DUF26 kinases have homology to DUF26 containing loci, expressed |
| BRs+C-N             | qSDW10-1    | 10 | <a href="#">LOC_Os10g04750</a> | 2279444 - 2278550   | OsFBX362 - F-box domain containing protein, expressed                                 |
| BRs+C-N             | qSDW10-1    | 10 | <a href="#">LOC_Os10g04780</a> | 2300571 - 2299438   | OsFBX363 - F-box domain containing protein, expressed                                 |
| Cold                | qSWW7-1     | 7  | <a href="#">LOC_Os07g01310</a> | 191044 - 197084     | glutamate receptor, putative, expressed                                               |
| Cold                | qSWW7-1     | 7  | <a href="#">LOC_Os07g01340</a> | 213778 - 219544     | gibberellin 2-beta-dioxygenase 7, putative, expressed                                 |
| Cold                | qSWW7-1     | 7  | <a href="#">LOC_Os07g01370</a> | 235903 - 237446     | peroxidase precursor, putative, expressed                                             |
| Cold                | qSWW7-1     | 7  | <a href="#">LOC_Os07g01380</a> | 239515 - 240945     | peroxidase precursor, putative, expressed                                             |
| Cold                | qSWW7-1     | 7  | <a href="#">LOC_Os07g01400</a> | 252818 - 253867     | peroxidase precursor, putative, expressed                                             |

|              |             |    |                                |                     |                                                                                 |
|--------------|-------------|----|--------------------------------|---------------------|---------------------------------------------------------------------------------|
| Cold         | qSWW7-1     | 7  | <a href="#">LOC_Os07g01410</a> | 259712 - 262744     | peroxidase precursor, putative, expressed                                       |
| old          | qSWW7-1     | 7  | <a href="#">LOC_Os07g01420</a> | 264525 - 265650     | peroxidase precursor, putative, expressed                                       |
| Cold         | qSWW7-1     | 7  | <a href="#">LOC_Os07g01440</a> | 291032 - 292026     | plastocyanin-like domain containing protein, putative, expressed                |
| Cold         | qSWW7-1     | 7  | <a href="#">LOC_Os07g01450</a> | 294566 - 292640     | DNA directed RNA polymerase, 7 kDa subunit domain containing protein, expressed |
| Cold         | qSWW7-1     | 7  | <a href="#">LOC_Os07g01470</a> | 302864 - 303349     | circumsporozoite protein precursor, putative, expressed                         |
| Cold         | qSWW7-1     | 7  | <a href="#">LOC_Os07g01480</a> | 306009 - 307555     | oxygen evolving enhancer protein 3 domain containing protein, expressed         |
| Cold         | qSWW7-1     | 7  | <a href="#">LOC_Os07g01490</a> | 309744 - 306009     | kinesin motor domain containing protein, putative, expressed                    |
| BRs+C-C      | qSWW1-2     | 1  | <a href="#">LOC_Os01g17070</a> | 9816783 - 9822750   | OsDegp1 - Putative Deg protease homologue, expressed                            |
| BRs+C-C      | qSWW9-1     | 9  | <a href="#">LOC_Os09g27620</a> | 16786041 - 16788255 | PHD-finger domain containing protein, putative, expressed                       |
| BRs+C-C      | qSWW9-1     | 9  | <a href="#">LOC_Os09g27650</a> | 16822234 - 16825686 | ZOS9-14 - C2H2 zinc finger protein, expressed                                   |
| BRs+C-C      | qSWW9-1     | 9  | <a href="#">LOC_Os09g27660</a> | 16829409 - 16837307 | OsFBO21 - F-box and other domain containing protein, expressed                  |
| BRs+C-N      | qSSL1-1     | 1  | <a href="#">LOC_Os01g21840</a> | 12250987 - 12257719 | transposon protein, putative, unclassified, expressed                           |
| BRs+C-C      | qSRL12-6    | 12 | <a href="#">LOC_Os12g41750</a> | 25869905 - 25867093 | transposon protein, putative, unclassified, expressed                           |
| Cold/BRs+C-N | qSDW1-3/4   | 1  | <a href="#">LOC_Os01g17080</a> | 9825970 - 9823099   | transposon protein, putative, unclassified, expressed                           |
| Cold/BRs+C-N | qSDW6-18/17 | 6  | <a href="#">LOC_Os06g44800</a> | 27067208 - 27063980 | transposon protein, putative, Ac/Ds sub-class, expressed                        |
| BRs+C-N      | qSDW10-1    | 10 | <a href="#">LOC_Os10g04760</a> | 2282724 - 2280969   | transposon protein, putative, CACTA, En/Spm sub-class, expressed                |
| Cold         | qSWW7-1     | 7  | <a href="#">LOC_Os07g01390</a> | 242462 - 248622     | transposon protein, putative, CACTA, En/Spm sub-class, expressed                |
| BRs+C-C      | qSWW1-2     | 1  | <a href="#">LOC_Os01g17080</a> | 9825970 - 9823099   | transposon protein, putative, unclassified, expressed                           |
| BRs+C-N      | qSSL1-1     | 1  | <a href="#">LOC_Os01g21690</a> | 12166733 - 12170415 | retrotransposon, putative, centromere-specific, expressed                       |
| BRs+C-N      | qSSL1-1     | 1  | <a href="#">LOC_Os01g21720</a> | 12189343 - 12187950 | retrotransposon protein, putative, Ty3-gypsy subclass                           |
| BRs+C-N      | qSSL1-1     | 1  | <a href="#">LOC_Os01g21760</a> | 12209585 - 12210813 | retrotransposon protein, putative, unclassified                                 |
| BRs+C-C      | qSRL12-6    | 12 | <a href="#">LOC_Os12g41730</a> | 25846192 - 25852257 | retrotransposon protein, putative, unclassified, expressed                      |
| BRs+C-C      | qSRL12-6    | 12 | <a href="#">LOC_Os12g41740</a> | 25862884 - 25862018 | retrotransposon protein, putative, unclassified                                 |
| Cold/BRs+C-N | qSDW6-1/2   | 6  | <a href="#">LOC_Os06g01060</a> | 48391 - 40328       | retrotransposon protein, putative, Ty3-gypsy subclass, expressed                |
| Cold/BRs+C-N | qSDW9-2/3   | 9  | <a href="#">LOC_Os09g10900</a> | 5986513 - 5989914   | retrotransposon protein, putative, unclassified, expressed                      |
| Cold/BRs+C-N | qSDW9-2/3   | 9  | <a href="#">LOC_Os09g10890</a> | 5971976 - 5977219   | retrotransposon protein, putative, unclassified, expressed                      |
| Cold/BRs+C-N | qSDW9-2/3   | 9  | <a href="#">LOC_Os09g10870</a> | 5954108 - 5958902   | retrotransposon protein, putative, unclassified, expressed                      |
| BRs+C-N      | qSDW9-1     | 9  | <a href="#">LOC_Os09g04520</a> | 2406717 - 2410208   | retrotransposon protein, putative, Ty3-gypsy subclass, expressed                |
| BRs+C-N      | qSDW9-1     | 9  | <a href="#">LOC_Os09g04530</a> | 2415665 - 2419187   | retrotransposon protein, putative, Ty3-gypsy subclass, expressed                |
| BRs+C-N      | qSDW9-1     | 9  | <a href="#">LOC_Os09g04540</a> | 2422444 - 2419520   | retrotransposon protein, putative, unclassified, expressed                      |
| BRs+C-N      | qSDW9-1     | 9  | <a href="#">LOC_Os09g04550</a> | 2425674 - 2430409   | retrotransposon protein, putative, unclassified, expressed                      |
| BRs+C-N      | qSDW9-1     | 9  | <a href="#">LOC_Os09g04560</a> | 2434843 - 2434379   | retrotransposon protein, putative, unclassified, expressed                      |
| BRs+C-N      | qSDW9-1     | 9  | <a href="#">LOC_Os09g04570</a> | 2436804 - 2439580   | retrotransposon protein, putative, unclassified                                 |
| BRs+C-N      | qSDW9-1     | 9  | <a href="#">LOC_Os09g04580</a> | 2440452 - 2444776   | retrotransposon protein, putative, unclassified                                 |
| BRs+C-N      | qSDW9-1     | 9  | <a href="#">LOC_Os09g04590</a> | 2447267 - 2446629   | retrotransposon protein, putative, unclassified, expressed                      |

|                          |             |    |                                |                     |                                                                  |
|--------------------------|-------------|----|--------------------------------|---------------------|------------------------------------------------------------------|
| BRs+C-N                  | qSDW9-1     | 9  | <a href="#">LOC_Os09g04610</a> | 2455233 - 2457153   | retrotransposon protein, putative, Ty3-gypsy subclass, expressed |
| BRs+C-N                  | qSDW9-1     | 9  | <a href="#">LOC_Os09g04660</a> | 2481910 - 2485993   | retrotransposon protein, putative, unclassified, expressed       |
| BRs+C-N                  | qSDW9-1     | 9  | <a href="#">LOC_Os09g04740</a> | 2527005 - 2522416   | retrotransposon protein, putative, Ty3-gypsy subclass, expressed |
| BRs+C-N                  | qSDW9-1     | 9  | <a href="#">LOC_Os09g04750</a> | 2534111 - 2534927   | retrotransposon protein, putative, Ty3-gypsy subclass, expressed |
| BRs+C-N                  | qSDW9-1     | 9  | <a href="#">LOC_Os09g04780</a> | 2544661 - 2544897   | retrotransposon protein, putative, unclassified                  |
| BRs+C-N                  | qSDW9-5     | 9  | <a href="#">LOC_Os09g27640</a> | 16801495 - 16799952 | retrotransposon protein, putative, unclassified                  |
| BRs+C-N                  | qSDW10-1    | 10 | <a href="#">LOC_Os10g04640</a> | 2215376 - 2219718   | retrotransposon protein, putative, unclassified, expressed       |
| BRs+C-N                  | qSDW10-1    | 10 | <a href="#">LOC_Os10g04740</a> | 2271236 - 2265971   | retrotransposon protein, putative, unclassified, expressed       |
| BRs+C-N                  | qSDW10-1    | 10 | <a href="#">LOC_Os10g04810</a> | 2322519 - 2319464   | retrotransposon protein, putative, Ty3-gypsy subclass            |
| Cold                     | qSWW7-1     | 7  | <a href="#">LOC_Os07g01330</a> | 208790 - 208326     | retrotransposon protein, putative, unclassified                  |
| Cold                     | qSWW7-1     | 7  | <a href="#">LOC_Os07g01350</a> | 226028 - 226378     | retrotransposon protein, putative, unclassified, expressed       |
| Cold                     | qSWW7-1     | 7  | <a href="#">LOC_Os07g01360</a> | 232835 - 230588     | retrotransposon protein, putative, unclassified, expressed       |
| Cold                     | qSWW7-1     | 7  | <a href="#">LOC_Os07g01430</a> | 272067 - 278026     | retrotransposon protein, putative, Ty3-gypsy subclass, expressed |
| Cold                     | qSWW7-1     | 7  | <a href="#">LOC_Os07g01500</a> | 313665 - 319435     | retrotransposon protein, putative, unclassified, expressed       |
| Cold                     | qSWW7-1     | 7  | <a href="#">LOC_Os07g01510</a> | 323322 - 320065     | retrotransposon protein, putative, unclassified, expressed       |
| BRs+C-C                  | qSWW9-1     | 9  | <a href="#">LOC_Os09g27640</a> | 16801495 - 16799952 | retrotransposon protein, putative, unclassified                  |
| BRs+C-N                  | qSSL1-1     | 1  | <a href="#">LOC_Os01g21700</a> | 12176157 - 12176726 | hypothetical protein                                             |
| BRs+C-N                  | qSSL1-1     | 1  | <a href="#">LOC_Os01g21730</a> | 12199004 - 12198238 | hypothetical protein                                             |
| BRs+C-N                  | qSSL1-1     | 1  | <a href="#">LOC_Os01g21800</a> | 12231162 - 12231556 | hypothetical protein                                             |
| BRs+C-N                  | qSSL1-1     | 1  | <a href="#">LOC_Os01g21830</a> | 12249408 - 12248605 | hypothetical protein                                             |
| BRs+C-N                  | qSDW9-1     | 9  | <a href="#">LOC_Os09g04700</a> | 2500313 - 2500021   | hypothetical protein                                             |
| BRs+C-N                  | qSDW9-1     | 9  | <a href="#">LOC_Os09g04760</a> | 2535764 - 2535378   | hypothetical protein                                             |
| BRs+C-N                  | qSDW9-1     | 9  | <a href="#">LOC_Os09g04770</a> | 2540148 - 2539390   | hypothetical protein                                             |
| Cold                     | qSSL11-1    | 11 | <a href="#">LOC_Os11g11970</a> | 6646433 - 6647140   | expressed protein                                                |
| Cold                     | qSSL11-1    | 11 | <a href="#">LOC_Os11g11980</a> | 6648986 - 6650344   | expressed protein                                                |
| BRs+C-N                  | qSSL1-1     | 1  | <a href="#">LOC_Os01g21660</a> | 12154685 - 12156630 | expressed protein                                                |
| BRs+C-N                  | qSSL1-1     | 1  | <a href="#">LOC_Os01g21680</a> | 12164080 - 12163770 | expressed protein                                                |
| BRs+C-N                  | qSSL1-1     | 1  | <a href="#">LOC_Os01g21740</a> | 12204078 - 12203402 | expressed protein                                                |
| BRs+C-N                  | qSSL1-1     | 1  | <a href="#">LOC_Os01g21750</a> | 12205888 - 12205547 | expressed protein                                                |
| BRs+C-N                  | qSSL1-1     | 1  | <a href="#">LOC_Os01g21780</a> | 12220348 - 12224299 | expressed protein                                                |
| BRs+C-N                  | qSSL1-1     | 1  | <a href="#">LOC_Os01g21790</a> | 12225766 - 12225123 | expressed protein                                                |
| BRs+C-N                  | qSSL1-1     | 1  | <a href="#">LOC_Os01g21810</a> | 12232535 - 12234767 | expressed protein                                                |
| BRs+C-N                  | qSSL1-1     | 1  | <a href="#">LOC_Os01g21870</a> | 12270402 - 12270037 | expressed protein                                                |
| BRs+C-C                  | qSRL12-6    | 12 | <a href="#">LOC_Os12g41760</a> | 25875554 - 25873568 | expressed protein                                                |
| BRs+C-C                  | qSRL12-6    | 12 | <a href="#">LOC_Os12g41770</a> | 25878380 - 25877950 | expressed protein                                                |
| BRs+C-C                  | qSRL12-6    | 12 | <a href="#">LOC_Os12g41810</a> | 25898041 - 25894317 | expressed protein                                                |
| BRs+C-C                  | qSRL12-6    | 12 | <a href="#">LOC_Os12g41850</a> | 25918563 - 25920483 | expressed protein                                                |
| Cold/BRs+C-N             | qSDW1-3/4   | 1  | <a href="#">LOC_Os01g17060</a> | 9796174 - 9793959   | expressed protein                                                |
| Cold/BRs+C-N             | qSDW1-3/4   | 1  | <a href="#">LOC_Os01g17065</a> | 9810633 - 9809343   | expressed protein                                                |
| Cold/BRs+C-N             | qSDW6-1/2   | 6  | <a href="#">LOC_Os06g01050</a> | 33589 - 37124       | expressed protein                                                |
| Cold/BRs+C-N             | qSDW6-18/17 | 6  | <a href="#">LOC_Os06g44790</a> | 27062657 - 27059070 | expressed protein                                                |
| Cold/BRs+C-N             | qSDW6-18/17 | 6  | <a href="#">LOC_Os06g44780</a> | 27054106 - 27054779 | expressed protein                                                |
| Cold/BRs+C-N             | qSDW6-18/17 | 6  | <a href="#">LOC_Os06g44770</a> | 27047926 - 27046712 | expressed protein                                                |
| Cold/BRs+C-N             | qSDW6-18/17 | 6  | <a href="#">LOC_Os06g44760</a> | 27043124 - 27045828 | expressed protein                                                |
| Cold/BRs+C-N             | qSDW9-2/3   | 9  | <a href="#">LOC_Os09g10880</a> | 5961154 - 5966211   | expressed protein                                                |
| Cold/BRs+C-N             | qSDW9-2/3   | 9  | <a href="#">LOC_Os09g10865</a> | 5950962 - 5951439   | expressed protein                                                |
| Cold/BRs+C-N             | qSDW9-2/3   | 9  | <a href="#">LOC_Os09g10860</a> | 5943847 - 5943545   | expressed protein                                                |
| Cold/BRs+C-N/<br>BRs+C-C | qSDW6-5/6/4 | 6  | <a href="#">LOC_Os06g01070</a> | 50099 - 50641       | expressed protein                                                |
| BRs+C-N                  | qSDW9-1     | 9  | <a href="#">LOC_Os09g04504</a> | 2400181 - 2396780   | expressed protein                                                |
| BRs+C-N                  | qSDW9-1     | 9  | <a href="#">LOC_Os09g04508</a> | 2405236 - 2401956   | expressed protein                                                |
| BRs+C-N                  | qSDW9-1     | 9  | <a href="#">LOC_Os09g04600</a> | 2450436 - 2450046   | expressed protein                                                |



|                     |          |    |                       |                     |                   |
|---------------------|----------|----|-----------------------|---------------------|-------------------|
| BRs+C-N             | qSDW9-1  | 9  | <u>LOC_Os09g04650</u> | 2479042 - 2478779   | expressed protein |
| BRs+C-N             | qSDW9-1  | 9  | <u>LOC_Os09g04690</u> | 2497809 - 2497167   | expressed protein |
| BRs+C-N             | qSDW10-1 | 10 | <u>LOC_Os10g04625</u> | 2209029 - 2208448   | expressed protein |
| BRs+C-N             | qSDW10-1 | 10 | <u>LOC_Os10g04630</u> | 2212018 - 2212907   | expressed protein |
| BRs+C-N             | qSDW10-1 | 10 | <u>LOC_Os10g04660</u> | 2220769 - 2224867   | expressed protein |
| BRs+C-N             | qSDW10-1 | 10 | <u>LOC_Os10g04690</u> | 2240843 - 2239218   | expressed protein |
| BRs+C-N             | qSDW10-1 | 10 | <u>LOC_Os10g04710</u> | 2247890 - 2248524   | expressed protein |
| BRs+C-N             | qSDW10-1 | 10 | <u>LOC_Os10g04770</u> | 2292768 - 2289182   | expressed protein |
| BRs+C-N             | qSDW10-1 | 10 | <u>LOC_Os10g04800</u> | 2317293 - 2317584   | expressed protein |
| BRs+C-C             | qSDW11-1 | 11 | <u>LOC_Os11g39920</u> | 23791977 - 23795809 | expressed protein |
| BRs+C-N/<br>BRs+C-C | qSWW6-2  | 6  | LOC_Os06g01070        | 50099 - 50641       | expressed protein |
| Cold                | qSWW7-1  | 7  | <u>LOC_Os07g01320</u> | 199857 - 195763     | expressed protein |
| Cold                | qSWW7-1  | 7  | <u>LOC_Os07g01460</u> | 299704 - 301426     | expressed protein |
| BRs+C-C             | qSWW1-2  | 1  | <u>LOC_Os01g17060</u> | 9796174 - 9793959   | expressed protein |
| BRs+C-C             | qSWW1-2  | 1  | <u>LOC_Os01g17065</u> | 9810633 - 9809343   | expressed protein |
| BRs+C-C             | qSWW9-1  | 9  | <u>LOC_Os09g27610</u> | 16781152 - 16784471 | expressed protein |

BRs+C-N, the data under normal temperature condition were used as the control; BRs+C-C, the data under cold treatment condition were used as the control. .
